## **SARS-CoV-2-RNA viremia is associated to hypercytokinemia and critical illness in COVID-19**

Jesús F Bermejo-Martin<sup>1,2,3\*</sup>, Milagros González-Rivera<sup>4,5\*</sup>, Raquel Almansa<sup>1,2,3\*</sup>, Dariela Micheloud<sup>6\*</sup>, Marta Domínguez-Gil<sup>7\*</sup>, Salvador Resino<sup>8\*</sup>, Marta Martín-Fernández<sup>1,2</sup>, Pablo Ryan Murua<sup>9</sup>, Felipe Pérez-García<sup>10</sup>, Luis Tamayo<sup>1,11</sup>, Raúl Lopez-Izquierdo<sup>12</sup>, Elena Bustamante<sup>13</sup>, César Aldecoa<sup>1,14,15</sup>, José Manuel Gómez<sup>16</sup>, Jesús Rico-Feijoo<sup>1,15</sup>, Antonio Orduña<sup>17</sup>, Raúl Méndez<sup>18</sup>, Isabel Fernández Natal<sup>19</sup>, Gregoria Megías<sup>20</sup>, Montserrat González-Estecha<sup>4,5</sup>, Demetrio Carriedo<sup>21</sup>, Cristina Doncel<sup>1,2,3</sup>, Noelia Jorge<sup>1,2,3</sup>, Félix del Campo<sup>22</sup>, José Antonio Fernández-Ratero<sup>23</sup>, Wysali Trapiello<sup>24</sup>, Paula González-Jiménez<sup>18</sup>, Guadalupe Ruiz<sup>24</sup>, Alyson A. Kelvin<sup>25,26</sup>, Ali Toloue Ostadgavahi<sup>25,26</sup>, Ruth Oneizat<sup>7</sup>, Luz María Ruiz<sup>7</sup>, Iria Miguéns<sup>6</sup>, Esther Gargallo<sup>6</sup>, Ioana Muñoz<sup>6</sup>, Sara Pelegrin<sup>15</sup>, Silvia Martín<sup>1,15</sup>, Pablo García Olivares<sup>16</sup>, Jamil Antonio Cedeño<sup>16</sup>, Tomás Ruiz Albi<sup>22</sup>, Carolina Puertas<sup>4</sup>, Jose Ángel Berezo<sup>1,11</sup>, Gloria Renedo<sup>13</sup>, Rubén Herrán<sup>1,11</sup>, Juan Bustamante-Munguira<sup>27</sup>, Pedro Enríquez<sup>11</sup>, Ramón Cicuendez<sup>13</sup>, Jesús Blanco<sup>11</sup>, Jesica Abadia<sup>28</sup>, Julia Gómez Barquero<sup>28</sup>, Nuria Mamolar<sup>13</sup>, Natalia Blanca-López<sup>9</sup>, Luis Jorge Valdivia<sup>21</sup>, Belén Fernández Caso<sup>19</sup>, María Ángeles Mantecón<sup>20</sup>, Anna Motos<sup>3,29</sup>, Laia Fernandez-Barat<sup>3,29</sup>, Ricard Ferrer<sup>3,30</sup>, Ferrán Barbé<sup>3,31</sup>, Antoni Torres<sup>3,29</sup><sup>Δ</sup>, Rosario Menéndez<sup>3,18</sup><sup>Δ</sup>, José María Eiros<sup>7</sup><sup>Δ</sup>, David J Kelvin<sup>Δ</sup><sup>25,26</sup>.

\* These authors contributed equally

<sup>Δ</sup> These authors contributed equally

1. Group for Biomedical Research in Sepsis (BioSepsis). Instituto de Investigación Biomédica de Salamanca, (IBSAL), Paseo de San Vicente, 58-182, 37007 Salamanca, Spain

2. Hospital Universitario Río Hortega, Calle Dulzaina, 2, 47012 Valladolid, Spain.
3. Centro de Investigación Biomédica en Red en Enfermedades Respiratorias (CIBERES), Instituto de Salud Carlos III, Av. de Monforte de Lemos, 3-5, 28029 Madrid, Spain
4. Department of Laboratory Medicine, Hospital General Universitario Gregorio Marañón, Calle del Dr. Esquerdo, 46, 28007 Madrid, Spain.
5. Department of Medicine, Faculty of Medicine, Universidad Complutense de Madrid, Plaza de Ramón y Cajal, s/n, 28040 Madrid, Spain.
6. Emergency Department, Hospital General Universitario Gregorio Marañón, Calle del Dr. Esquerdo, 46, 28007 Madrid, Spain.
7. Microbiology Service, Hospital Universitario Río Hortega, Calle Dulzaina, 2, 47012 Valladolid, Spain
8. Viral Infection and Immunity Unit, Centro Nacional de Microbiología, Instituto de Salud Carlos III, Ctra. de Pozuelo, 28, 28222 Majadahonda, Spain
9. Hospital Universitario Infanta Leonor, Av. Gran Vía del Este, 80, 28031 Madrid, Spain
10. Servicio de Microbiología Clínica, Hospital Universitario Príncipe de Asturias, Carr. de Alcalá, s/n, 28805, Madrid, Spain
11. Intensive Care Unit, Hospital Universitario Río Hortega, Calle Dulzaina, 2, 47012 Valladolid, Spain.
12. Emergency Department, Hospital Universitario Río Hortega, Calle Dulzaina, 2, 47012 Valladolid, Spain.
13. Intensive Care Unit, Hospital Clínico Universitario de Valladolid. Av. Ramón y Cajal, 3, 47003 Valladolid, Spain

14. Department of Anesthesiology, Facultad de Medicina de Valladolid, Av. Ramón y Cajal, 7, 47005 Valladolid, Spain.
15. Anesthesiology and Reanimation Service, Hospital Universitario Río Hortega, Calle Dulzaina, 2, 47012 Valladolid, Spain.
16. Intensive Care Unit. Hospital General Universitario Gregorio Marañón. Calle del Dr. Esquerdo, 46, 28007 Madrid, Spain.
17. Microbiology Service, Hospital Clínico Universitario de Valladolid, Av. Ramón y Cajal, 3, 47003 Valladolid, Spain.
18. Pulmonology Service, Hospital Universitario y Politécnico de La Fe, Avinguda de Fernando Abril Martorell, 106, 46026, Valencia Spain
19. Clinical Microbiology Department. Complejo Asistencial Universitario de León. Calle Altos de nava, s/n, 24001 León, Spain.
20. Microbiology Service, Hospital Universitario de Burgos, Av. Islas Baleares, 3, 09006 Burgos, Spain
21. Intensive Care Unit. Complejo Asistencial Universitario de León. Calle Altos de nava, s/n, 24001 León, Spain.
22. Pneumology Service, Hospital Universitario Río Hortega / Biomedical Engineering Group, Universidad de Valladolid, Calle Dulzaina, 2, 47012 Valladolid, Spain.
23. Intensive Care Unit. Hospital Universitario de Burgos, Av. Islas Baleares, 3, 09006 Burgos, Spain.
24. Clinical Analysis Service. Hospital Clínico Universitario de Valladolid, Av. Ramón y Cajal, 3, 47003 Valladolid, Spain

25. Department of Microbiology and Immunology, Faculty of Medicine, Dalhousie University, Halifax, Nova Scotia, B3H 4R2, Canada

26. International Institute of Infection and Immunity, Shantou University Medical College, 22 Xinling Rd, Jinping, Shantou, Guangdong, China.

27. Department of Cardiovascular Surgery, Hospital Clínico Universitario de Valladolid. Av. Ramón y Cajal, 3, 47003 Valladolid, Spain

28. Infectious diseases clinic, Internal Medicine Department, Hospital Universitario Río Hortega, Valladolid, Calle Dulzaina, 2, 47012 Valladolid, Spain

29. Department of Pulmonology, Hospital Clinic de Barcelona, Universidad de Barcelona, Institut D investigacions August Pi I Sunyer (IDIBAPS), Carrer del Rosselló, 149, 08036 Barcelona, Spain.

30. Intensive Care Department, Vall d'Hebron Hospital Universitari. SODIR Research Group, Vall d'Hebron Institut de Recerca, Passeig de la Vall d'Hebron, 119, 08035 Barcelona, Spain.

31. Respiratory Department, Institut Ricerca Biomedica de Lleida, Av. Alcalde Rovira Roure, 80, 25198 Lleida, Spain.

**Corresponding author 1:** David J Kelvin Department of Microbiology and Immunology, Dalhousie University, Halifax, Nova Scotia, B3H 4R2, Canada. E-mail address: [dkelvin@jfdc.org](mailto:dkelvin@jfdc.org).

**Authors 'contribution:** JFBM, DJK, JB, RF, FB, AT and RM designed the study. JFBM and DJK wrote the manuscript and interpreted the data. RA coordinated the clinical study and drafted the figures. MGR, DM, PR, FPG, LT, RLI, EB, CA, JMG, JR, RM, MIF, GM, MGE, DC, FDC, JFR, WT, PGJ, GR, IM, EG,IM, SP, SM, PGO, JAC, TRA, CP, JAB,

GR, RH, JB, PE, RC, JA, JGB, NM, NBL, LJV, BFC, MAM recruited the patients and /or collected the clinical data. MDG, AO, RO, LMR and JME performed the assays for the detection of SARS-CoV-2 IgG and viremia. CD and NJ profiled the immunological mediators. SR and MMF developed the statistical analysis and drafted the figures. AAK, ATO, AM and LF performed the literature search. All the authors critically reviewed the manuscript.

**Sources of support :** This work was supported by awards from the Canadian Institutes of Health Research, the Canadian 2019 Novel Coronavirus (COVID-19) Rapid Research Funding initiative (CIHR OV2 – 170357), Research Nova Scotia (DJK), Atlantic Genome/Genome Canada (DJK), Li-Ka Shing Foundation (DJK), Dalhousie Medical Research Foundation (DJK), the “Subvenciones de concesión directa para proyectos y programas de investigación del virus SARS-CoV2, causante del COVID-19”, FONDO - COVID19, Instituto de Salud Carlos III (COV20/00110, CIBERES, 06/06/0028), (AT) and finally by the “Convocatoria extraordinaria y urgente de la Gerencia Regional de Salud de Castilla y León, para la financiación de proyectos de investigación en enfermedad COVID-19” (GRS COVID 53/A/20) (CA). DJK is a recipient of the Canada Research Chair in Translational Vaccinology and Inflammation.

**Running head:** RNA-viremia and critical illness in COVID-19

**Subject category list:**

10.14 Pneumonia: Viral Infections

10.10 Pathogenic Mechanisms of Infections

**Total word count:** 2713

## “At a Glance Commentary”

**Scientific Knowledge on the Subject:** there is a limited number of works evaluating the presence of SARS-CoV-2 RNA in the serum or plasma of patients with COVID-19, involving few patients, most of them with non-severe disease. In consequence, the impact that the presence of SARS-CoV-2 RNA viremia has on disease biology and severity is largely unknown.

**What This Study Adds to the Field:** to our knowledge, this is the first study comparing the prevalence of SARS-CoV-2-RNA viremia in outpatients (n=50), patients admitted to the ward (n=100), and critically ill patients (n=100) with COVID-19. Multivariate analysis demonstrates that the presence of SARS-CoV-2-RNA viremia in those COVID-19 patients needing hospitalization translates into an 8-fold increase in the risk of presenting critical illness. Presence of viremia in COVID-19 patients is associated with high levels of ferritin and LDH, hypercytokinemia (increased levels of CXCL10, CCL2, IL-10, IL-1ra, G-CSF & IL-15), lymphopenia and low monocyte and platelet counts. These data indicate that SARS-CoV-2-RNA viremia could be a driver of immunological dysregulation and severe disease in COVID-19

This article has an online data supplement, which is accessible from this issue's table of content online at [www.atsjournals.org](http://www.atsjournals.org)

## **Abstract**

**Rationale:** whether systemic dissemination of SARS-CoV-2 has any impact on COVID-19 severity and also on the immunological alterations observed in this disease is largely unknown.

**Objectives:** We determined the association of plasma SARS-CoV-2 RNA with clinical severity, laboratory findings and immunological parameters in a cohort of 250 patients with confirmed COVID-19 infection.

**Methods:** Three groups of patients were studied: 50 outpatients, 100 hospitalised ward patients, and 100 critically ill. The association between plasma SARS-CoV-2 RNA and severity was evaluated using multivariate ordinal logistic regression analysis and Generalized Linear Model (GLM) analysis with a binomial distribution. The association between plasma SARS-CoV-2 RNA and laboratory parameters was evaluated using multivariate GLM with a gamma distribution.

**Measurements and Main Results:** The prevalence of SARS-CoV-2-RNA viremia increased in parallel with severity of infection (22% in outpatients, 36 % in those hospitalised in wards, and 82% in those at the ICU). In hospitalised patients, the presence of SARS-CoV-2-RNA viremia was independently associated to critical illness: (adjusted OR= 8.30 [CI95%=4.21 - 16.34],  $p < 0.001$ ). SARS-CoV-2-RNA viremia was an independent predictor of higher levels of ferritin, LDH and cytokines (involving CXCL10, CCL-2, IL-15, IL-10, IL-1ra and GCS-F), and lower of lymphocytes, monocytes and platelets counts

**Conclusions:** SARS-CoV-2-RNA viremia is a robust marker of critical illness in COVID-19. Our findings support that hypercytokinemia in COVID-19 is a reactive event in response to the dissemination of viral material at the systemic level.

**Abstract word count:** 234

**Key words:** Coronavirus, plasma, ICU, cytokines.



## Introduction

With well over 17 million cases and 715,013 deaths globally, Coronavirus disease 2019 (COVID-19) has become the top economic and health priority worldwide.<sup>1</sup> As the severe acute respiratory syndrome coronavirus 2 (SARS-CoV-2) pandemic continues to emerge in low income countries and resource-poor settings, tools for the early identification and management of severe COVID-19 cases are of paramount importance. It is unclear how many affected individuals need hospitalization. Amongst hospitalized patients, around 10–20% are admitted to the intensive care unit (ICU), 3–10% require intubation and 2–5% die.

2

SARS-CoV-2 RNA detection in nasopharyngeal swabs is the most common diagnostic test for SARS-CoV-2 infection; however viral RNA can be found in sputum, lung samples, peripheral blood, serum, stool samples, and to a limited extent urine.<sup>3 4 5</sup> While the lungs are most often affected, severe COVID-19 can also induce inflammatory cell infiltration, haemorrhage, degeneration or necrosis in other organs (spleen, lymph nodes, kidney, liver, central nervous system).<sup>6</sup> Whether systemic spreading of the virus or viral components has any role in the pathogenesis of the “sepsis-like” failure in different organs<sup>6</sup> or in immunological dysregulation<sup>7</sup> observed in severe COVID-19 is currently unknown.

In this study, by using an integrative approach, we evaluated first the association between the presence of SARS-CoV-2 RNA in peripheral blood plasma from COVID-19 patients and severity. We next studied the impact of SARS-CoV-2 RNA viremia on a number of biological parameters denoting tissue damage and immunological dysregulation in this disease.

## Methods

**Study design:** 250 adult patients with a positive nasopharyngeal swab PCR test for SARS-CoV-2 administered at participating hospitals were recruited during the first pandemic wave in Spain from March 16<sup>th</sup> to the 15<sup>th</sup> of April 2020. The patients recruited were of three different categories. The first corresponded to patients examined at an emergency room and discharged within the first 24 hours (outpatients group, n=50). The second group were patients hospitalized to pneumology, infectious diseases or internal medicine wards. This group neither required critical care nor died during hospitalization (wards group, n=100). The third group corresponded to patients admitted to the ICU (n=100). Patients recruited by participating hospital are detailed in Table E1 in the online data supplement. The study was registered at Clinicaltrials.gov (NCT04457505).

**Blood samples:** Plasma from blood collected in EDTA tubes samples was obtained from the three groups of patients at a median collection day of 7, 8 and 10 respectively, and also from 20 blood donors (10 men and 10 women).

**Laboratory works:** immunological mediators were profiled in plasma using the Ella-SimplePlex™ (San Jose, California, U.S.A) immunoassay. RNA was extracted from 150 µl of plasma using an automated system, eMAG® from bioMérieux® (Marcy l'Etoile, France). Detection of SARS-CoV-2 RNA was performed in five µl of the eluted solution using the CLART® COVID-19 platform from Genomica® (Madrid, Spain). IgG specific for the Nucleocapsid Protein of SARS-CoV-2 was detected in 150 µl of plasma using the Abbott Architect SARS-CoV-2 IgG Assay (Illinois, U.S.A).

**Ethical aspects:** The study was approved by the Committee for Ethical Research of the coordinating institution, “Comite de Etica de la Investigacion con Medicamentos del Area de Salud de Salamanca”, code PI 2020 03 452. Informed consent was obtained orally when

clinically possible. In the remaining cases, the informed consent waiver was authorized by the Ethics committee.

**Statistical analysis:** Statistical analysis was performed by using Statistical Package for the Social Science (SPSS) 20.0 (SPSS INC, Chicago, IL, U.S.A), Stata 15.0 (StataCorp, Texas, U.S.A) and Minitab 19.2 software. For the demographic and clinical characteristics of the patients, the differences between groups were assessed using the Chi-square test for categorical variables. Differences for continuous variables were assessed by using the Kruskal-Wallis test with post hoc tests adjusting for multiple comparisons. Statistical association analysis was performed using different regression models to assess the relationship between viremia and outcome variables. An ordinal logistic regression (OLR) model was used considering the outcome variable as ordinal (outpatients, wards, and ICU), providing an odds ratio (OR). Generalized Linear Models (GLM) with binomial distribution were used when the outcome variable was dichotomous (outpatients vs. wards, and wards vs. ICU), also providing an odds ratio (OR). GLM with a gamma distribution (log-link) was used when the outcome variable was continuous, providing arithmetic mean ratios (AMR). In all cases, the analysis was performed first without adjustment and was later adjusted for the most relevant covariates in our study. P-values were corrected using the false discovery rate (FDR) with the Benjamini and Hochberg (q-values) procedure.

## **Results**

**Clinical characteristics of the patients** (Table 1): Patients diagnosed with SARS-CoV-2 infection based on a positive nasopharyngeal test and requiring hospitalization (either general ward or ICU) were older (median 64 years of age for ward and 66 years for ICU) than those patients discharged to their home from the ER (median age 48 years of age).

There were no significant differences regarding age between ward and ICU hospitalised patients. Critically ill patients (ICU admitted) were more frequently male than those in the other groups. Comorbidities of obesity, hypertension, dyslipidemia and type II diabetes were more commonly found in patients requiring hospitalization, with no significant differences found in the comorbidities profile between critically ill and non-critically ill hospitalized patients. ICU patients showed significantly lower levels of O<sub>2</sub> saturation at the time of admission to the ICU compared to other patients admitted to the ER or the ward. 100% of ICU patients presented with pulmonary infiltrates of whom 93 % also had bilateral pneumonia, these findings were significantly higher than the incidence of pulmonary infiltrates and bilateral pneumonia found in the other two groups. Glucose levels were higher in the group of critically ill patients, who also showed higher values of INR, D-dimers, LDH, GPT, ferritin, C-reactive protein and lower haematocrit. ICU patients showed pronounced lymphopenia and lower monocyte counts; however, neutrophil counts were increased. ICU patients more frequently received experimental treatments during their hospitalization period, including hydroxicloroquine, corticoids, remdesivir, tocilizumab, lopinavir/ritonavir or beta-interferon. ICU patients stayed longer in the hospital, with 48 % fatalities reported in this group. The number of missing values for the variables registered in this study are reported in Table E2 in the online data supplement.

**Prevalence of SARS-CoV-2-RNA viremia and specific SARS-Cov-2 IgG.** To assess the possible systemic nature of SAS-CoV-2 infections in hospitalized patients we determined the presence of SARS-CoV-2 RNA in plasma. As depicted in table 1 and figure 1, the frequency of SARS-CoV-2-RNA viremia was higher in the critically ill patients (82%) compared to ward patients (36%) and outpatients (22%) ( $p<0.001$ ). No statistical differences were found in plasma viral RNA between the outpatients and the patients in the

ward ( $p = 0.081$ ). Critically ill patients also had a higher frequency of specific SARS-CoV-2 IgG responses than the other groups (70% in ICU compared to 52% and 49% in the outpatients and ward groups,  $p < 0.05$ , table 1 and figure 1). No significant differences were found between the group of outpatients and those admitted to the ward.

**SARS-CoV-2-RNA viremia and disease severity.** When the association between viremia and clinical status was evaluated, multivariate ordinal logistic regression analysis revealed that SARS-CoV-2-RNA viremia was a predictor of severity across the three categories considered in our study [OR= 8.24,  $p < 0.001$ , (CI 95%= 4.71; 14.41)] (see Table E3 in the online data supplement). When we compared outpatients with admitted ward patients, multivariate GLM analysis showed that viremia was not significantly associated with either group (Table 2). In contrast, when the group of ward patients was compared to ICU patients, multivariate GLM analysis showed that viremia was strongly associated with patient severity requiring critical care [OR = 8.3,  $p < 0.001$ , (CI 95% = 4.21-16.34)] (Table 2). In the patients admitted to the ICU, no significant difference in the presence of SARS-CoV-2-RNA was found between survivors and non survivors: 42 out of 48 of non survivors had viremia (87.5%), while 40 out of 52 survivors (76.9%) had viremia,  $p = 0.169$ .

**Impact of SARS-CoV-2-RNA viremia on laboratory and immunological parameters:**

Multivariate GLM analysis showed that SARS-CoV-2-RNA viremia was an independent predictor of higher levels of ferritin, LDH and higher levels of chemokines (CXCL10, CCL-2), cytokines (IL-15, IL-10, IL-1ra) and GCS-F (Figure 2 and Table E4 in the online data supplement). In contrast, viremia predicted lower lymphocytes, monocytes and platelets counts and lower concentration of IL-4 in plasma (Figure 2 and Table E4 in the online data supplement). Patients requiring hospitalization at the ward showed significantly increased levels of IL-10, CXCL0, IL-1ra, IL-6 and TNF- $\alpha$  compared to

outpatients. Critically ill patients showed significantly higher levels of GM-CSF, CXCL10, CCL2, IL-10, IL-6 and IL-15 compared to ward patients and outpatients (figure 3 and Table E5 in the online data supplement).

## **Discussion**

Here we report that SARS-CoV-2 viral RNA is detected in the plasma of the vast majority of those COVID-19 patients admitted to the ICU (82%). In hospitalized COVID-19 patients, presence of SARS-CoV-2-RNA viremia translates into an 8-fold increase in the risk of presenting critical illness, independently of age, sex and major comorbidities. Importantly, these findings suggest that detection of viral RNA in plasma may serve as a simple test to identify those patients needing critical care.

Whether the finding of viral RNA is “true viremia” with the live virus found in the plasma and peripheral blood is unknown; however, the SARS-CoV-2 virus has been reported to be difficult to culture from blood.<sup>4</sup> Alternatively, but not mutually exclusive, the presence of viral RNA in the blood may represent a substantial spill over event from virally infected tissue. Importantly, SARS-CoV-2-RNA viremia was associated with higher levels of plasma LDH (a marker of necrosis and cellular injury) and lower O<sub>2</sub> saturation, which supports viral involvement in the genesis of tissue damage and respiratory failure in patients with severe COVID-19.

Interestingly, SARS-CoV-2-RNA viremia maybe a contributing factor in the development of hypercytokinemia in patients with severe COVID-19, since the presence of viral RNA in plasma predicted higher levels of CXCL10, CCL2, IL-15, IL-10, IL-1ra and G-CSF.

Recognition of viral RNA by endosomal receptors such as TLR7 in human plasmacytoid dendritic cells and B cells, or TLR8 in myeloid cells, activate the intracellular signalling pathways enhancing cytokine production.<sup>8</sup> In fact, it has recently been demonstrated that

SARS-CoV-2 genome has more single-stranded RNA fragments that could be recognized by TLR7/8 than the SARS-CoV-1 genome, which suggest the potential of SARS-CoV-2 to induce hyperactivation of innate immunity.<sup>9</sup>

From a cohort of SARS-CoV-1 patients in 2003, we previously demonstrated that severe SARS patients had increased levels of CXCL10 and CCL2 in serum during the early onset of symptoms.<sup>10</sup> CXCL10 is a potent chemoattractant for activated Th1 lymphocytes and natural killer cells and is thought to play a role in the temporal development of innate and adaptive immunity.<sup>11</sup> Signalling via the CXCL10 cognate receptor, CXCR3, mediates immunopathology during other highly pathogenic respiratory virus infections such as H5N1 influenza virus.<sup>11</sup> In our current cohort, CXCL10 was the most accurate identifier of SARS-CoV-2-RNA viremia in plasma (area under the curve (AUC), [CI95%],  $p$ ) = 0.85 [0.80 – 0.89), <0.001), suggesting its potential role as a surrogate biomarker of viremia.

CCL2 is one of the key chemokines that regulate migration and infiltration of monocytes/macrophages.<sup>12</sup> Interestingly, during SARS-CoV-1 infection, the presence of high levels of CXCL10 and CCL2 was coincident with the presence of lymphopenia<sup>13</sup>, as occurs in patients with severe COVID-19.<sup>14 15</sup> In SARS-CoV-1 severe disease, self-sustaining expression of proinflammatory chemokines has been suggested to represent a compensatory mechanism for an ineffective adaptive immune response to clear the virus.<sup>10</sup>

IL-10 is a major immunomodulatory cytokine inducing immunosuppression. Zhao Y et al reported IL-10 (along with IL-1ra, another immunomodulatory cytokine capable of suppressing the IL-1 signalling pathway) to be associated with the severity of COVID-19.<sup>16</sup> In our study, both cytokines were elevated in the plasma of patients requiring hospitalization, with higher levels of IL-10 in those patients admitted to the ICU. Whether elevation of IL-10 and IL-1RA represents a mechanism of viral evasion or an attempt of

the immune system to control an exuberant inflammatory response remains to be elucidated.<sup>17 18</sup>

The association between SARS-CoV-2-RNA viremia and IL-15 is also especially intriguing, since IL-15 was the cytokine better differentiating clinical ward patients from ICU patients (AUC: 0.82 [0.76 – 0.88], <0.001). Previously, we identified IL-15 as a signature of critical illness in the 2009 influenza pandemics.<sup>19</sup> IL-15 is a pleiotropic cytokine that induces T-cell proliferation and enhances natural killer (NK) cell cytotoxicity.<sup>20</sup> It may also play an essential role in T cell or NK cell mediated tissue destruction.<sup>21</sup> During respiratory distress, elevated systemic levels of IL-15 is observed in non survivors.<sup>22</sup> Moreover, during Hantavirus infection, IL-15 drives massive NK cell response and high levels of IL-15 have been associated with severe disease and fatal outcome.<sup>23</sup> Recently, it was reported that circulating NK cells were elevated in COVID-19 severe patients<sup>14</sup> illustrating the potentially important role of IL-15 in rendering NK function during COVID-19 pathogenesis. IL-15 also induces the formation and release of neutrophil extracellular traps (NETs)<sup>24</sup>, which could mediate endothelial damage and thrombosis activation.<sup>25</sup> Endothelial cells can produce IL-15, which promotes transendothelial migration of NK cells and T Cells.<sup>26 27</sup> Future work will examine the therapeutic importance of modulating IL-15 function in COVID-19 disease.

The presence of hyperferritinaemia has been highlighted in COVID-19, since it is, along with hypercytokinemia and high LDH, a marker of macrophage activation syndrome (MAS).<sup>28 29</sup> Another signature of MAS is the decrease in platelet concentrations in blood<sup>30</sup>. Even though platelet counts did not show significant variation across the three severity groups (Table 1), those patients with SARS-CoV-2-RNA viremia showed significantly lower platelet counts than the other patients (198,000 vs 230,000 cells/mm<sup>3</sup>,  $p = 0.003$ ). In



turn, critically ill non survivors showed lower platelet counts than survivors (179,000 vs 221,000 cells/mm<sup>3</sup>,  $p = 0.001$ ).

Severe COVID-19 is characterised by the frequent finding of lymphopenia<sup>15</sup>. Since in our study SARS-CoV-2-RNA viremia was associated with low lymphocyte and monocyte counts, it is intriguing to posit the question as to whether lymphopenia and the decrease in the monocyte counts are a result of direct cytopathic events or emigration due to localized chemokine and IL-15 expression, or a combination of these processes. Cytopenias in blood are also a shared feature between severe COVID-19 and MAS.

Our findings revealing the association between SARS-Cov-2 RNA viremia, hypercytokinemia, higher ferritin and LDH levels and lower lymphocyte, monocyte and platelets counts suggest that systemic dissemination of the virus or viral material could be the driver of the MAS-like syndrome observed in severe COVID-19.

In our work, most ICU patients with SARS-CoV-2-RNA viremia had already developed a specific IgG response against the virus (70.7 %), which would support the notion that continued viral replication is a persistent event in the course of the of antibody responses. Additional information on cytotoxic T cells and the role of NK cells in controlling COVID-19 disease will help link the cellular immune events with viral replication and control in disease progression.

A limitation of our study is that we did not evaluate viral load. In consequence we could not assess differences in the amount of viral RNA between severity groups, and also between survivors and non survivors. In addition, neither the potential infectivity of plasma nor the presence of live virus in plasma was assessed. Follow up studies should investigate the presence of viral RNA in specific blood cells as well.

In conclusion, the high prevalence of SARS-CoV-2-RNA viremia in critically ill patients suggests that these patients are unable to control SARS-Cov-2 replication in tissues or blood cells. Viremia is associated with hypercytokinemia and other signatures typically found in conditions characterised by immunological dysregulation such as MAS. These findings suggest a potential role of SARS-CoV-2-RNA viremia as a driver of severity in COVID-19. Our results have major potential clinical repercussions that deserve to be investigated. 1) The presence of SARS-CoV-2-RNA viremia could help to promptly identify those patients needing critical care with a simple one step test. 2) Early control of the virus with either antivirals, hyperimmune plasma or monoclonal antibodies could decrease the risk of further development of critical illness in this disease. 3) Early antiviral treatment could also prevent immunological derangement / dysregulation.

**Acknowledgements:** we thank SEIMC-GESIDA Foundation for the scientific sponsoring of this project. We thank also the “Centro de Hemoterapia y Hemodonación de Castilla y León, CHEMCYL”, which provided the plasma samples used in the healthy control group.

## References:

- 1 COVID-19 Dashboard by the Center for Systems Science and Engineering (CSSE) at Johns Hopkins University (JHU). <https://coronavirus.jhu.edu/map.html>.
- 2 Guan W-J, Ni Z-Y, Hu Y, *et al.* Clinical Characteristics of Coronavirus Disease 2019 in China. *N Engl J Med* 2020; published online Feb 28. DOI:10.1056/NEJMoa2002032.
- 3 Cevik M, Bamford CGG, Ho A. COVID-19 pandemic—a focused review for clinicians. *Clinical Microbiology and Infection* 2020; **26**: 842–7.
- 4 Zhang W, Du R-H, Li B, *et al.* Molecular and serological investigation of 2019-nCoV infected patients: implication of multiple shedding routes. *Emerging Microbes & Infections* 2020; **9**: 386–9.
- 5 Chen X, Zhao B, Qu Y, *et al.* Detectable Serum Severe Acute Respiratory Syndrome Coronavirus 2 Viral Load (RNAemia) Is Closely Correlated With Drastically Elevated Interleukin 6 Level in Critically Ill Patients With Coronavirus Disease 2019. *Clin Infect Dis* DOI:10.1093/cid/ciaa449.
- 6 Li H, Liu L, Zhang D, *et al.* SARS-CoV-2 and viral sepsis: observations and hypotheses. *Lancet* 2020; **395**: 1517–20.
- 7 Yang L, Liu S, Liu J, *et al.* COVID-19: immunopathogenesis and Immunotherapeutics. *Signal Transduct Target Ther* 2020; **5**: 128.
- 8 Birra D, Benucci M, Landolfi L, *et al.* COVID 19: a clue from innate immunity. *Immunol Res* 2020; **68**: 161–8.
- 9 Moreno-Eutimio MA, López-Macías C, Pastelin-Palacios R. Bioinformatic analysis and identification of single-stranded RNA sequences recognized by TLR7/8 in the SARS-CoV-2, SARS-CoV, and MERS-CoV genomes. *Microbes Infect* 2020; **22**: 226–9.
- 10 Cameron MJ, Bermejo-Martin JF, Danesh A, Muller MP, Kelvin DJ. Human immunopathogenesis of severe acute respiratory syndrome (SARS). *Virus Res* 2008; **133**: 13–9.
- 11 Cameron CM, Cameron MJ, Bermejo-Martin JF, *et al.* Gene expression analysis of host innate immune responses during Lethal H5N1 infection in ferrets. *J Virol* 2008; **82**: 11308–17.
- 12 Deshmane SL, Kremlev S, Amini S, Sawaya BE. Monocyte Chemoattractant Protein-1 (MCP-1): An Overview. *J Interferon Cytokine Res* 2009; **29**: 313–26.
- 13 Cameron MJ, Ran L, Xu L, *et al.* Interferon-mediated immunopathological events are associated with atypical innate and adaptive immune responses in patients with severe acute respiratory syndrome. *J Virol* 2007; **81**: 8692–706.

- 14 Liu J, Li S, Liu J, *et al.* Longitudinal characteristics of lymphocyte responses and cytokine profiles in the peripheral blood of SARS-CoV-2 infected patients. *EBioMedicine* 2020; **55**: 102763.
- 15 Bermejo-Martin JF, Almansa R, Menendez R, Mendez R, Kelvin DJ, Torres A. Lymphopenic community acquired pneumonia as signature of severe COVID-19. *Journal of Infection* 2020.
- 16 Zhao Y, Qin L, Zhang P, *et al.* Longitudinal COVID-19 profiling associates IL-1RA and IL-10 with disease severity and RANTES with mild disease. *JCI Insight* 2020; **5**. DOI:10.1172/jci.insight.139834.
- 17 Rojas JM, Avia M, Martín V, Sevilla N. IL-10: A Multifunctional Cytokine in Viral Infections. *J Immunol Res* 2017; **2017**. DOI:10.1155/2017/6104054.
- 18 Couper KN, Blount DG, Riley EM. IL-10: The Master Regulator of Immunity to Infection. *The Journal of Immunology* 2008; **180**: 5771–7.
- 19 Bermejo-Martin JF, Ortiz de Lejarazu R, Pumarola T, *et al.* Th1 and Th17 hypercytokinemia as early host response signature in severe pandemic influenza. *Crit Care* 2009; **13**: R201.
- 20 Perera P-Y, Lichy JH, Waldmann TA, Perera LP. The role of interleukin-15 in inflammation and immune responses to infection: implications for its therapeutic use. *Microbes Infect* 2012; **14**: 247–61.
- 21 Jabri B, Abadie V. IL-15 functions as a danger signal to regulate tissue-resident T cells and tissue destruction. *Nat Rev Immunol* 2015; **15**: 771–83.
- 22 Agouridakis P, Kyriakou D, Alexandrakis MG, Perisinakis K, Karkavitsas N, Bouros D. Association between increased levels of IL-2 and IL-15 and outcome in patients with early acute respiratory distress syndrome. *Eur J Clin Invest* 2002; **32**: 862–7.
- 23 Klingström J, Smed-Sörensen A, Maleki KT, *et al.* Innate and adaptive immune responses against human Puumala virus infection: immunopathogenesis and suggestions for novel treatment strategies for severe hantavirus-associated syndromes. *J Intern Med* 2019; **285**: 510–23.
- 24 Garley M, Jabloňská E, Surażyński A, *et al.* Cytokine Network & NETs. *Folia Biol (Praha)* 2017; **63**: 182–9.
- 25 Gardiner EE, Andrews RK. Neutrophil extracellular traps (NETs) and infection-related vascular dysfunction. *Blood Rev* 2012; **26**: 255–9.
- 26 Oppenheimer-Marks N, Brezinschek RI, Mohamadzadeh M, Vita R, Lipsky PE. Interleukin 15 is produced by endothelial cells and increases the transendothelial migration of T cells In vitro and in the SCID mouse-human rheumatoid arthritis model In vivo. *J Clin Invest* 1998; **101**: 1261–72.
- 27 Estess P, Nandi A, Mohamadzadeh M, Siegelman MH. Interleukin 15 induces endothelial hyaluronan expression in vitro and promotes activated T cell

extravasation through a CD44-dependent pathway in vivo. *J Exp Med* 1999; **190**: 9–19.

28McGonagle D, Sharif K, O'Regan A, Bridgewood C. The Role of Cytokines including Interleukin-6 in COVID-19 induced Pneumonia and Macrophage Activation Syndrome-Like Disease. *Autoimmun Rev* 2020; : 102537.

29Cron RQ, Davi S, Minoia F, Ravelli A. Clinical features and correct diagnosis of macrophage activation syndrome. *Expert Rev Clin Immunol* 2015; **11**: 1043–53.

30Fardet L, Galicier L, Lambotte O, *et al.* Development and validation of the HScore, a score for the diagnosis of reactive hemophagocytic syndrome. *Arthritis & Rheumatology (Hoboken, NJ)* 2014; **66**: 2613–20.

**Conflicts of interests:** the authors declare no conflicts of interests regarding this submission

---

|  | <b>Outpatients (1)</b> | <b>Ward (2)</b> | <b>ICU (3)</b> | <b><i>p</i> value<br/>(1 vs 2)</b> | <b><i>p</i> value<br/>(1 vs 3)</b> | <b><i>p</i> value<br/>(2 vs 3)</b> |
|--|------------------------|-----------------|----------------|------------------------------------|------------------------------------|------------------------------------|
|--|------------------------|-----------------|----------------|------------------------------------|------------------------------------|------------------------------------|

|                                                  |                                                         |             |             |             |         |         |         |
|--------------------------------------------------|---------------------------------------------------------|-------------|-------------|-------------|---------|---------|---------|
| <b>Characteristics</b>                           | <b>Age [years, median (IQR)]</b>                        | 48.50 [19]  | 64 [20]     | 66 [19]     | < 0.001 | < 0.001 | n.s.    |
|                                                  | <b>Male [% (n)]</b>                                     | 46 (23)     | 50 (50)     | 64 (64)     | n.s.    | 0.035   | 0.046   |
| <b>Comorbidities, [% (n)]</b>                    | <b>Alcoholism</b>                                       | 2 (1)       | 0 (0)       | 1 (1)       | n.s.    | n.s.    | n.s.    |
|                                                  | <b>Smoking</b>                                          | 4 (2)       | 5 (5)       | 6 (6)       | n.s.    | n.s.    | n.s.    |
|                                                  | <b>Drug abuse</b>                                       | 2 (1)       | 0 (0)       | 0 (0)       | n.s.    | n.s.    | n.a.    |
|                                                  | <b>Cardiac disease</b>                                  | 4 (2)       | 13 (13)     | 9 (9)       | n.s.    | n.s.    | n.s.    |
|                                                  | <b>Chronic vascular disease COPD</b>                    | 2 (1)       | 2 (2)       | 5 (5)       | n.s.    | n.s.    | n.s.    |
|                                                  |                                                         | 2 (1)       | 2 (2)       | 3 (3)       | n.s.    | n.s.    | n.s.    |
|                                                  | <b>Asthma</b>                                           | 8 (4)       | 6 (6)       | 2 (2)       | n.s.    | n.s.    | n.s.    |
|                                                  | <b>Obesity</b>                                          | 4 (2)       | 26 (26)     | 26 (26)     | 0.001   | 0.001   | n.s.    |
|                                                  | <b>Hypertension</b>                                     | 24 (12)     | 44 (44)     | 45 (45)     | 0.017   | 0.012   | n.s.    |
|                                                  | <b>Dyslipidemia</b>                                     | 16 (8)      | 41 (41)     | 34 (34)     | 0.002   | 0.021   | n.s.    |
|                                                  | <b>Chronic renal disease</b>                            | 2 (1)       | 3 (3)       | 3 (3)       | n.s.    | n.s.    | n.s.    |
|                                                  | <b>Chronic hepatic disease</b>                          | 2 (1)       | 0 (0)       | 3 (3)       | n.s.    | n.s.    | n.s.    |
|                                                  | <b>Neurological disease</b>                             | 0 (0)       | 6 (6)       | 3 (3)       | n.s.    | n.s.    | n.s.    |
|                                                  | <b>HIV</b>                                              | 0 (0)       | 0 (0)       | 1 (1)       | n.a.    | n.s.    | n.s.    |
|                                                  | <b>Autoimmune disease</b>                               | 2 (1)       | 1 (1)       | 1 (1)       | n.s.    | n.s.    | n.s.    |
|                                                  | <b>Chronic inflammatory bowel disease</b>               | 0 (0)       | 2 (2)       | 1 (1)       | n.s.    | n.s.    | n.s.    |
|                                                  | <b>Type 1 diabetes</b>                                  | 0 (0)       | 0 (0)       | 3 (3)       | n.a.    | n.s.    | n.s.    |
|                                                  | <b>Type 2 diabetes</b>                                  | 0 (0)       | 23 (23)     | 22 (22)     | < 0.001 | < 0.001 | n.s.    |
| <b>Cancer</b>                                    | 6 (3)                                                   | 2 (2)       | 1 (1)       | n.s.        | n.s.    | n.s.    |         |
| <b>Treatment during hospitalization, [% (n)]</b> | <b>Invasive mechanical ventilation</b>                  | 0 (0)       | 0 (0)       | 96 (96)     | n.a.    | < 0.001 | < 0.001 |
|                                                  | <b>Non-invasive mechanical ventilation</b>              | 0 (0)       | 15.1 (14)   | 34 (34)     | 0.004   | < 0.001 | 0.002   |
|                                                  | <b>Hydroxychloroquine</b>                               | 77.6 (38)   | 89 (89)     | 99 (99)     | n.s.    | < 0.001 | 0.003   |
|                                                  | <b>Chloroquine</b>                                      | 4.1 (2)     | 7 (7)       | 0 (0)       | n.s.    | 0.042   | 0.007   |
|                                                  | <b>Corticoids</b>                                       | 6.7 (3)     | 29.6 (29)   | 85 (85)     | 0.002   | < 0.001 | < 0.001 |
|                                                  | <b>Azithromycin</b>                                     | 15.9 (7)    | 84.8 (84)   | 84 (84)     | < 0.001 | < 0.001 | n.s.    |
|                                                  | <b>Remdesivir</b>                                       | 0 (0)       | 1 (1)       | 9 (9)       | n.s.    | 0.029   | 0.009   |
|                                                  | <b>Tocilizumab</b>                                      | 0 (0)       | 13 (13)     | 33 (33)     | 0.008   | < 0.001 | 0.001   |
|                                                  | <b>Lopinavir/ritonavir</b>                              | 74 (37)     | 35.4 (35)   | 96 (96)     | < 0.001 | < 0.001 | < 0.001 |
| <b>Beta Interferon</b>                           | 0 (0)                                                   | 0 (0)       | 55.6 (55)   | n.a.        | < 0.001 | < 0.001 |         |
| <b>Time course and outcome</b>                   | <b>Hospital stay [days, median (IQR)]</b>               | -           | 9 (6)       | 24 (19)     | n.a.    | n.a.    | < 0.001 |
|                                                  | <b>Viral RNA in plasma [% (n)]</b>                      | 22 (11)     | 36 (36)     | 82 (82)     | n.s.    | < 0.001 | < 0.001 |
|                                                  | <b>SARS-CoV-2 IgG, [% (n)]</b>                          | 52 (26)     | 49 (49)     | 70 (70)     | n.s.    | 0.030   | 0.002   |
|                                                  | <b>Hospital mortality, [% (n)]</b>                      | 0 (0)       | 0 (0)       | 48 (48)     | n.a.    | < 0.001 | < 0.001 |
|                                                  | <b>Temperature (°C) [median (IQR)]</b>                  | 36.50 (1.0) | 36.80 (1.4) | 37.00 (1.4) | -       | -       | -       |
|                                                  | <b>Systolic Arterial Pressure (mmHg) [median (IQR)]</b> | 120 (29)    | 126 (25)    | 120 (26)    | n.s.    | n.s.    | 0.013   |
|                                                  | <b>Oxygen saturation (%) [median (IQR)]</b>             | 96 (3)      | 94 (5)      | 92 (6)      | 0.002   | < 0.001 | 0.001   |
|                                                  | <b>Pulmonary infiltrate [% (n)]</b>                     | 72 (36)     | 93 (93)     | 100 (100)   | < 0.001 | < 0.001 | 0.007   |
|                                                  | <b>Bilateral pulmonary infiltrate [% (n)]</b>           | 26 (13)     | 67 (67)     | 93 (93)     | < 0.001 | < 0.001 | < 0.001 |
|                                                  | <b>Glucose (mg/dl) [median (IQR)]</b>                   | 99.5 (22)   | 112 (31)    | 160.50 (83) | 0.004   | < 0.001 | < 0.001 |
|                                                  | <b>Creatinine (mg/dl) [median (IQR)]</b>                | 0.84 (0.18) | 0.91 (0.33) | 0.88 (0.57) | -       | -       | -       |
|                                                  | <b>Na (mEq/L) [median (IQR)]</b>                        | 138 (4)     | 138 (5)     | 138.50 (7)  | -       | -       | -       |

|                                  |                                                            |                    |                         |                          |         |         |         |
|----------------------------------|------------------------------------------------------------|--------------------|-------------------------|--------------------------|---------|---------|---------|
| <b>Measurements at diagnosis</b> | <b>K (mEq/L) [median (IQR)]</b>                            | 3.90 (0.50)        | 4.10 (0.68)             | 3.95 (0.90)              | -       | -       | -       |
|                                  | <b>Platelets (cell x 10<sup>3</sup>/µl) [median (IQR)]</b> | 223 [97]           | 207 [113]               | 204 [126]                | -       | -       | -       |
|                                  | <b>INR [median (IQR)]</b>                                  | 1.04 (0.10)        | 1.11 (0.13)             | 1.22 (0.22)              | 0.001   | < 0.001 | < 0.001 |
|                                  | <b>D Dimer (pg/ml) [median (IQR)]</b>                      | 795278<br>[828234] | 1597362.50<br>[2024704] | 6182104.50<br>[52690922] | < 0.001 | < 0.001 | < 0.001 |
|                                  | <b>LDH (UI/L) [median (IQR)]</b>                           | 214 (73)           | 278 (138)               | 496 (285)                | 0.002   | < 0.001 | < 0.001 |
|                                  | <b>GPT (UI/L) [median (IQR)]</b>                           | 27 (43)            | 29 (29)                 | 44 (44.50)               | n.s.    | n.s.    | 0.016   |
|                                  | <b>Ferritin (pg/ml) [median (IQR)]</b>                     | 359507<br>[458748] | 523805<br>[534757]      | 923687<br>[1526492]      | n.s.    | < 0.001 | 0.002   |
|                                  | <b>CRP (mg/dl) [median (IQR)]</b>                          | 1.40 (3.50)        | 40.90 (89.18)           | 91 (182.10)              | < 0.001 | < 0.001 | 0.031   |
|                                  | <b>Haematocrit (%) [median (IQR)]</b>                      | 43.15 (4.72)       | 42.50 (6.50)            | 38.15 (6.48)             | n.s.    | < 0.001 | < 0.001 |
|                                  | <b>WBC (cells/mm<sup>3</sup>) [median (IQR)]</b>           | 6450 (2815)        | 7005 (4115)             | 9145 (6613)              | n.s.    | < 0.001 | 0.006   |
|                                  | <b>Lymphocytes (cells/mm<sup>3</sup>) [median (IQR)]</b>   | 1400 (805)         | 1000 (433)              | 540 (445)                | < 0.001 | < 0.001 | < 0.001 |
|                                  | <b>Neutrophils (cells/mm<sup>3</sup>) [median (IQR)]</b>   | 4260 (2625)        | 5250 (3918)             | 8300 (5880)              | 0.046   | < 0.001 | < 0.001 |
|                                  | <b>Monocytes (cells/mm<sup>3</sup>) [median (IQR)]</b>     | 500 (300)          | 400 (300)               | 300 (280)                | n.s.    | < 0.001 | 0.019   |
|                                  | <b>Eosinophils (cells/mm<sup>3</sup>) [median (IQR)]</b>   | 0 (100)            | 0 (40)                  | 0 (6)                    | n.s.    | n.s.    | n.s.    |
|                                  | <b>Basophils (cells/mm<sup>3</sup>) [median (IQR)]</b>     | 0 (0)              | 0 (20)                  | 5.25 (17)                | 0.001   | < 0.001 | n.s.    |

Table 1: Clinical characteristics of the patients: continuous variables are represented as [median, (interquartile range, IQR)]; categorical variables are represented as [%, (n)].; INR, International Normalized Ratio; n.s., not significant; n.a., not applicable. COPD (Chronic obstructive pulmonary disease), HIV (Human Immunodeficiency Virus), INR (International Normalized Ratio), LDH (Lactic Acid Dehydrogenase), GPT (glutamic-pyruvate transaminase); CRP (C-reactive protein), WBC (white blood cell).



|                 | GLM (outpatients vs wards) |          |        |       | GLM (wards vs ICU) |          |        |       |
|-----------------|----------------------------|----------|--------|-------|--------------------|----------|--------|-------|
|                 | OR                         | <i>p</i> | CI 95% |       | OR                 | <i>p</i> | CI 95% |       |
|                 |                            |          | lower  | upper |                    |          | lower  | upper |
| Viremia         | 2.12                       | 0.10     | 0.86   | 5.20  | 8.30               | < 0.001  | 4.21   | 16.34 |
| Age             | 1.06                       | < 0.001  | 1.03   | 1.09  | 1.00               | 0.97     | 0.98   | 1.02  |
| Sex             | 1.06                       | 0.88     | 0.48   | 2.32  | 1.86               | 0.06     | 0.97   | 3.56  |
| Obesity         | 4.89                       | 0.05     | 1.02   | 23.53 | 1.11               | 0.78     | 0.52   | 2.36  |
| Hypertension    | 1.19                       | 0.71     | 0.48   | 2.95  | 0.90               | 0.77     | 0.44   | 1.83  |
| Cardiac disease | 1.69                       | 0.55     | 0.29   | 9.83  | 0.69               | 0.51     | 0.23   | 2.07  |
| Asthma          | 1.02                       | 0.98     | 0.23   | 4.43  | 0.26               | 0.15     | 0.04   | 1.62  |
| Dyslipidemia    | 1.63                       | 0.33     | 0.60   | 4.40  | 0.84               | 0.66     | 0.40   | 1.79  |

Table 2: Multivariate generalized linear model with binomial distribution to assess the association between viremia and hospitalization at the wards in the comparison (outpatients vs wards) (left) and the association between viremia and hospitalization at the ICU in the comparison (wards vs ICU) (right).

## Figure legends

**Figure 1: prevalence of SARS-CoV-2-RNA viremia and SARS-CoV-2 IgG antibodies in each severity group.**

**Figure 2: Forest plot showing the result from the multivariate generalized linear model with a gamma distribution (log-link) to assess the association between viremia and laboratory and immunological parameters** Arithmetic mean ratios (AMR) adjusted by major comorbidities (Age, Sex, Obesity, Hypertension, Type II Diabetes, Cardiovascular disease, Asthma, Dyslipidemia) and disease severity category (outpatients, ward and ICU) are showed in the plot. .

**Figure 3: Box plots showing the immunological mediators' levels across severity groups.**

**SARS-CoV-2 RNA viremia (%)**

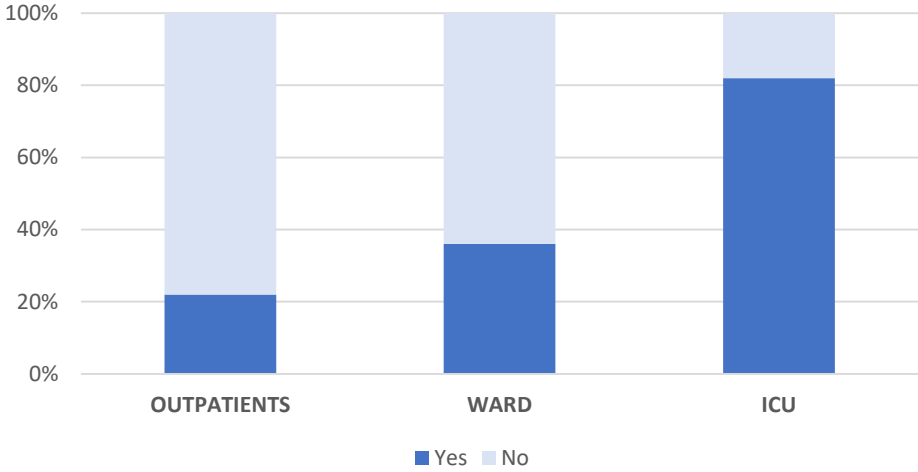

**SARS-CoV-2 IgG (%)**

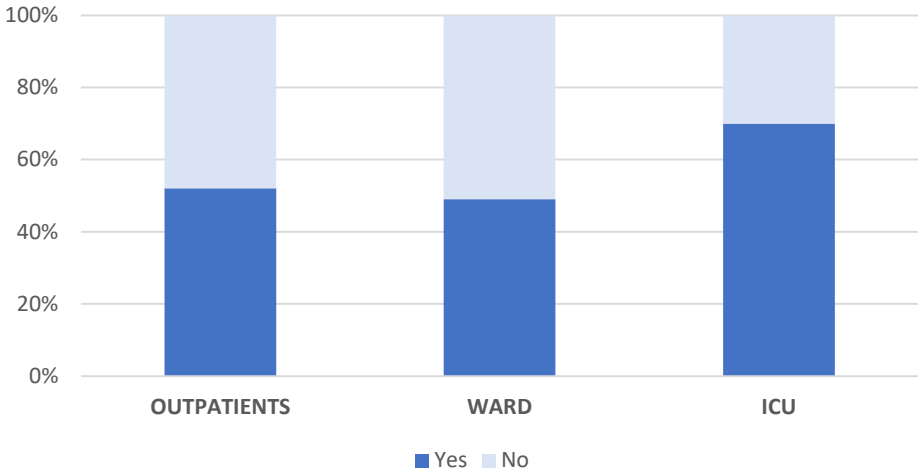

### VIREMIA

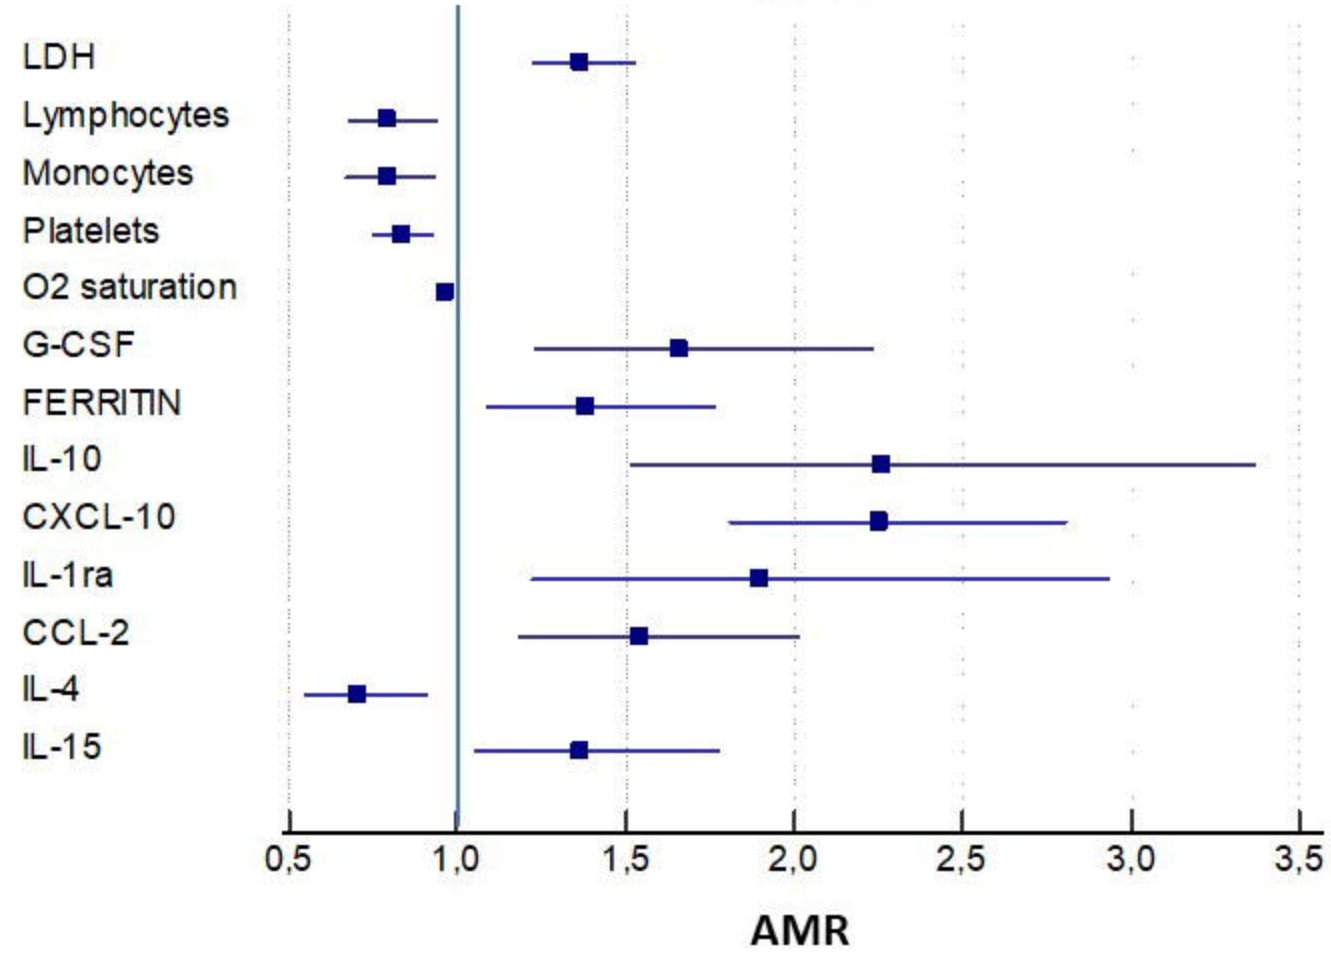

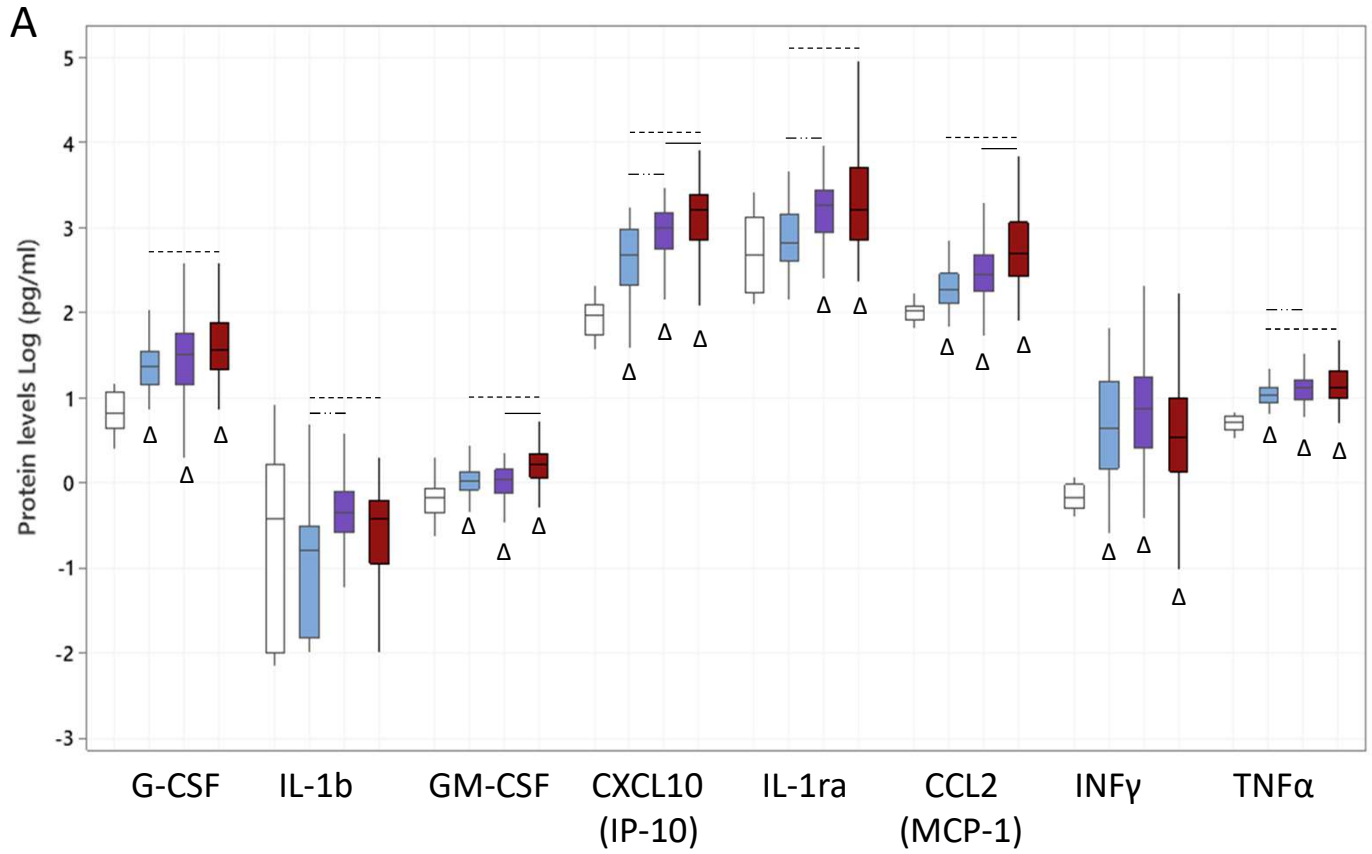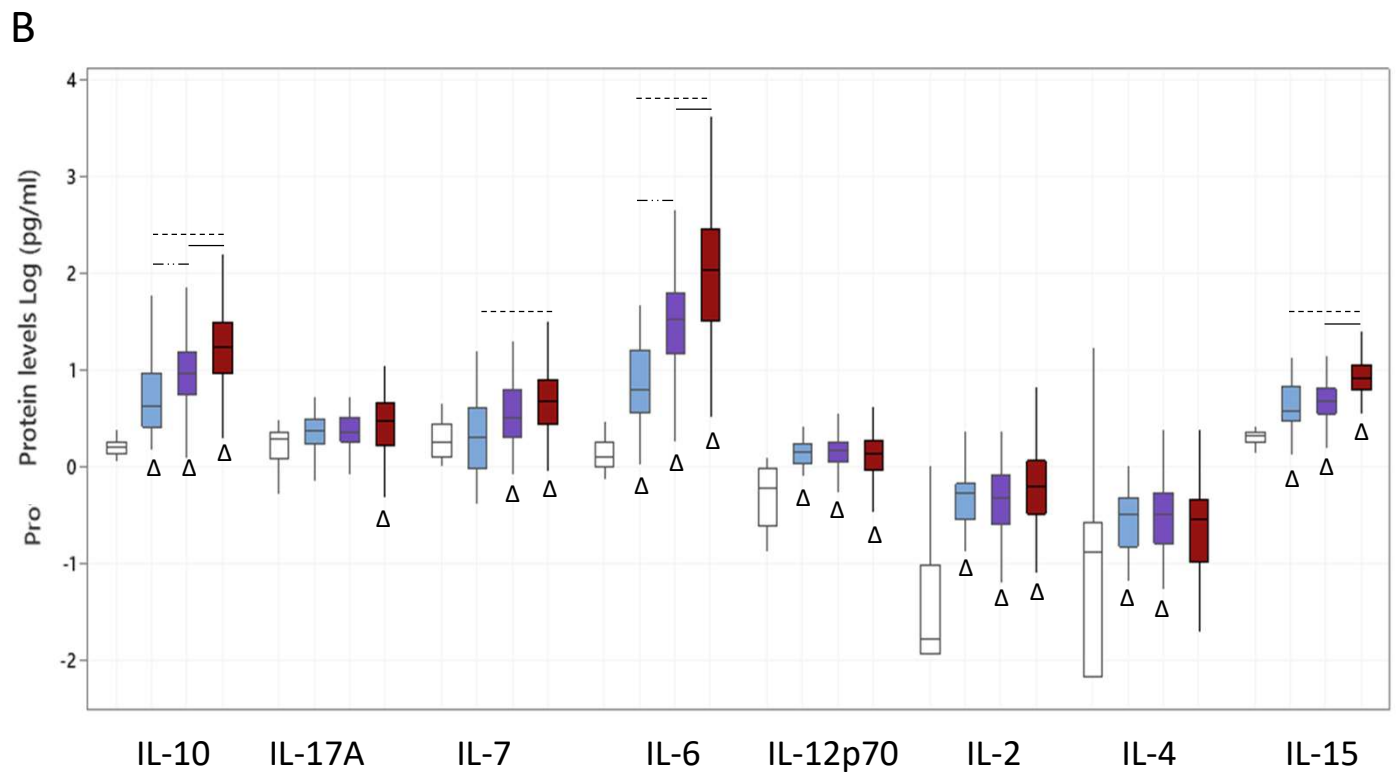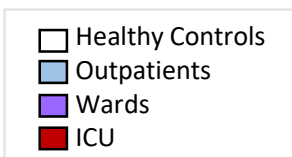

Source: https://www.medrxiv.org/content/medrxiv/early/2020/08/31/2020.08.25.20154252.full.pdf
